# Supplementary material for: AIEgen-incorporated nanoparticles as a probe for the construction of dual-luminophore pressure- and temperature-sensitive coatings
Source: Royal Society of Chemistry journal article supplement (doi:10.1039/d4tc01589d), 2024-01-01
Supplement: d4tc01589d1.pdf [file d4tc01589d1.pdf]

*Electronic Supplementary Information*

**AIEgen-Incorporated Nanoparticles as Probe for Construction of Dual-Luminophore Pressure and Temperature Sensitive Coatings**

Jiwei Li<sup>1,2</sup>, Yingying Ren<sup>1</sup>, Jiangeng Ma<sup>3</sup>, Qiu Wang<sup>\*2</sup> and Xiaozhong Qu<sup>\*1</sup>

<sup>1</sup> Center of Materials Science and Optoelectronics Engineering, College of Materials Science and Opto-Electronic Technology, University of Chinese Academy of Sciences, Beijing 101408, China.

<sup>2</sup> State Key Laboratory of High Temperature Gas Dynamics, Institute of Mechanics, Chinese Academy of Sciences, Beijing 100190, China.

<sup>3</sup> School of Aerospace Engineering, Xiamen University, Xiamen 361005, China.

\* Email: quxz@ucas.ac.cn (X.Q.), wangqiu@imech.ac.cn (Q.W.)

**1. Supplementary Figures**

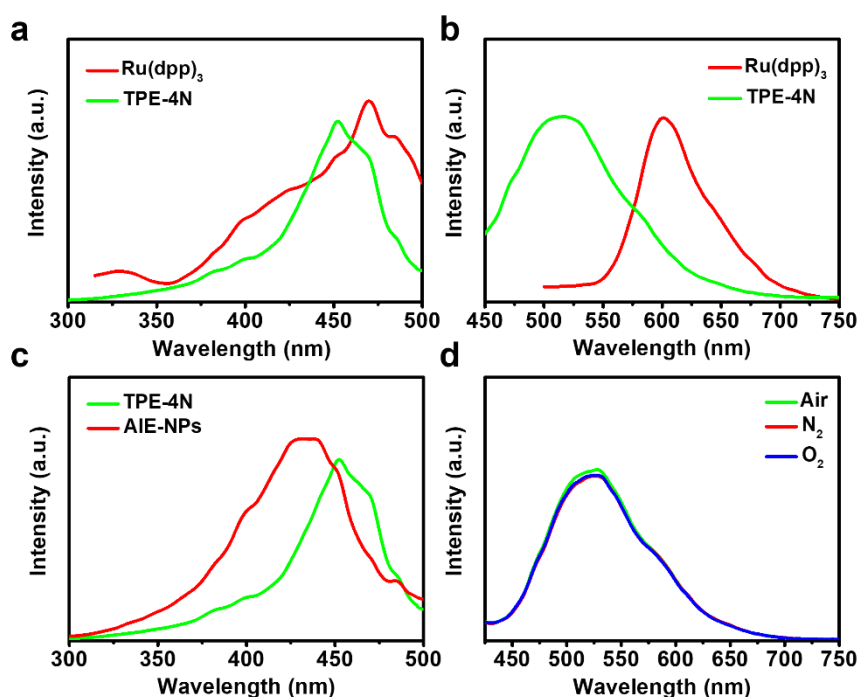

**Figure S1.** (a) Excitation spectra of TPE-4N powder and Ru(dpp)<sub>3</sub>. (b) Emission spectra of TPE-4N powder and Ru(dpp)<sub>3</sub>. (c) Excitation spectra of TPE-4N powder and AIE-NPs. (d) Emission spectra of TPE-4N powder with different gaseous environments.

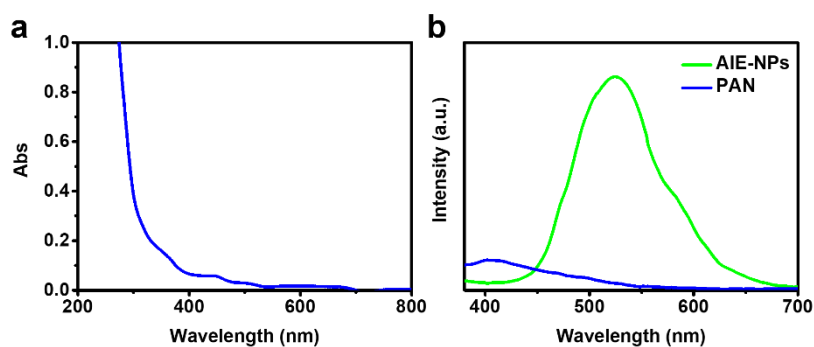

**Figure S2.** (a) Absorption spectrum of PAN. (b) Emission spectra of AIE-NPs and PAN under UV irradiation at 365 nm.

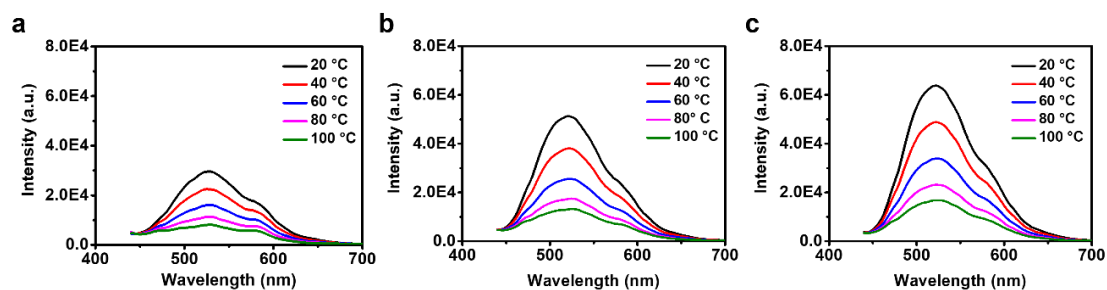

**Figure S3.** Fluorescence intensity of TPE-4N powder and AIE-NPs at different temperature from 20 °C to 100 °C. (a) TPE-4N powder. (b, c) AIE-NPs with mass ratio of TPE-4N to PAN of 1:20 (b) and 1:10 (w/w) (c).

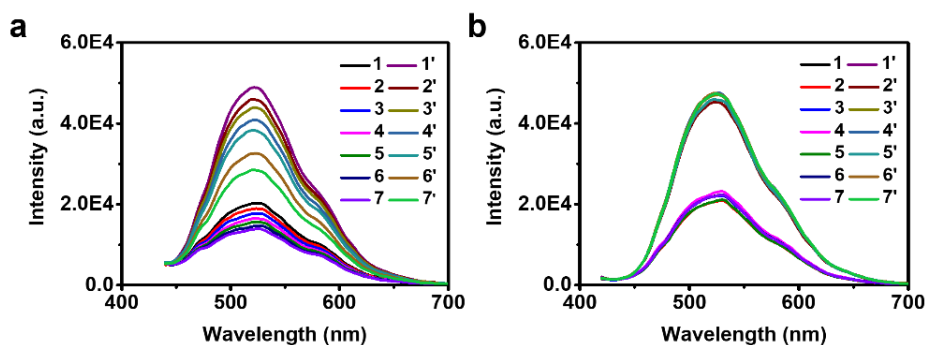

**Figure S4.** Cycles of heating and cooling between 80 °C (1 - 7) and 40 °C (1' - 7') on the fluorescence spectra of (a) TPE-4N powder and (b) AIE-NPs.

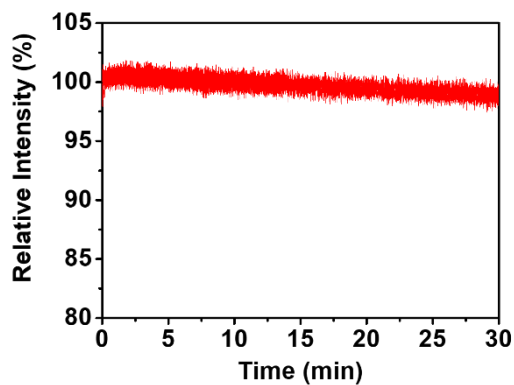

**Figure S5.** Time dependent emission intensity of Ru(dpp)<sub>3</sub> in coating by recording the emission of the luminophore at 600 nm upon excitation at 365 nm.

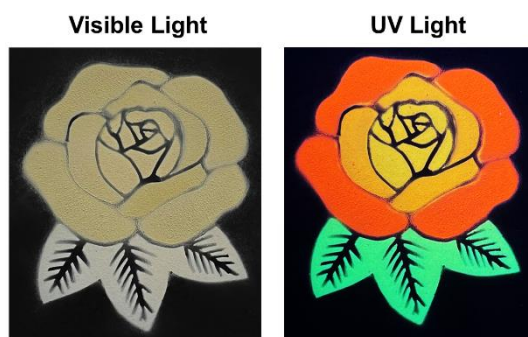

**Figure S6.** Sprayed patterns of a rose with dual-luminophore coating (flower) and AIE-NPs containing single luminophore coating (leaves) under visible and UV light.

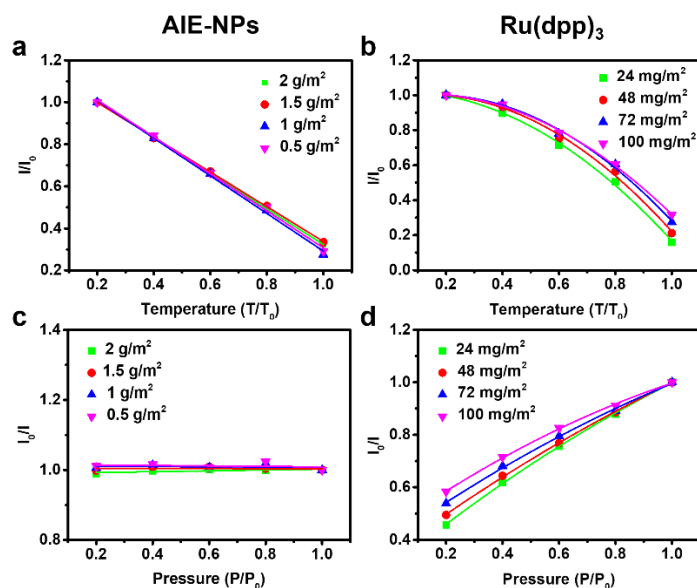

**Figure S7.** Influence of AIE-NPs and Ru(dpp)<sub>3</sub> loading on temperature and pressure sensitivity of the dual-luminophore coatings.

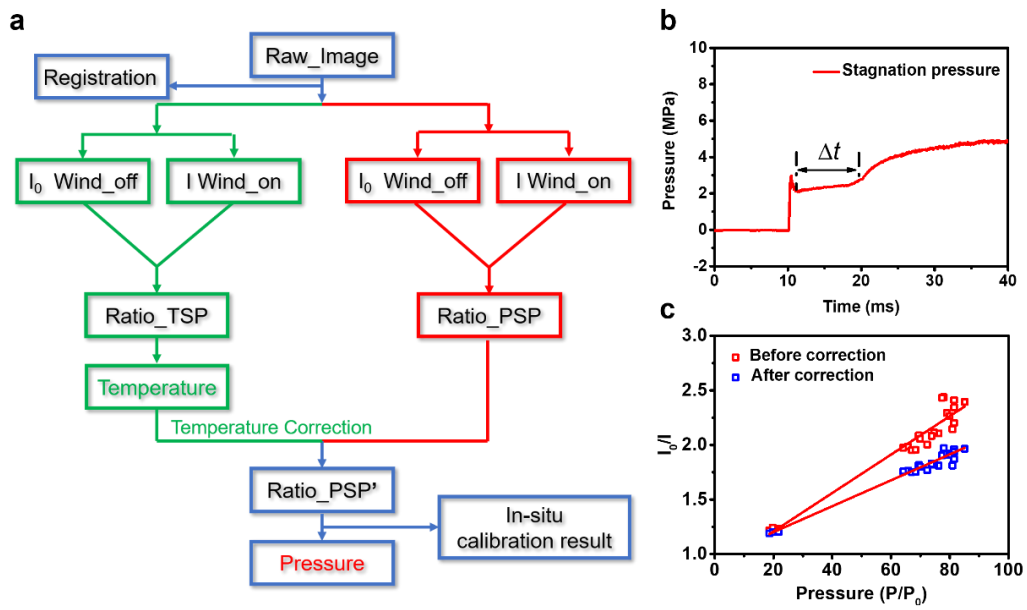

**Figure S8.** (a) Data processing procedures on images collected during aerodynamic test. (b) Effective test time of the case during wind tunnel running. (c) In situ calibration results of the case.

## 2. Pressure and Temperature Calibration

The relationship between pressure and luminescence intensity ( $I_1$  and  $I_2$  represent pressure and temperature sensitive luminophore respectively) can be expressed with the Stern-Volmer equation:

$$\frac{I_1(P_{ref}, T_{ref})}{I_1(P, T_{ref})} = A_0(T_{ref}) + A_1(T_{ref}) \frac{P}{P_{ref}} \quad (1)$$

where  $A_0(T_{ref})$  and  $A_1(T_{ref})$  are calibration coefficients,  $T_{ref}$  is reference temperature, 293 K,  $P_{ref}$  and  $P$  are the reference pressure (100 kPa) and measured pressure, respectively.

The calibration equation for the temperature is as follows:

$$\frac{I(P_{ref}, T)}{I(P_{ref}, T_{ref})} = \left\{ B_0(P_{ref}) + B_1(P_{ref}) \exp\left(-\frac{B_2(P_{ref})}{T}\right) \right\}^{-1} \quad (2)$$

where  $B_0$ ,  $B_1$  and  $B_2$  are calibration coefficients. According to the static calibration data, the relationship between temperature and luminescence intensity of Ru(dpp)<sub>3</sub> and AIE-NPs could be fitted with a quadratic fit curve and a liner curve as follows respectively:

$$\frac{I_1(P_{ref}, T_1)}{I_1(P_{ref}, T_{ref})} = B_{10} + B_{11} \frac{T_1}{T_{ref}} + B_{12} \left(\frac{T_1}{T_{ref}}\right)^2 \quad (3)$$

$$\frac{I_2(P_{ref}, T_2)}{I_2(P_{ref}, T_{ref})} = B_{20} + B_{21} \frac{T_2}{T_{ref}} \quad (4)$$

## 3. Temperature Correction

According to the calibration results, in practice, the pressure values were calculated from the luminescence intensity at each measurement and reference state derived from Eq. 1 as follows:

$$P = P_{ref} \frac{I_1(P_{ref}, T_{ref})/I_1(P, T_{ref}) - A_0(T_{ref})}{A_1(T_{ref})} \quad (5)$$

The sample temperature values were determined from the luminescence intensities of AIE-NP according to the following equation derived from Eq. 4:

$$T_2 = T_{ref} \left[ \frac{I_2(P_{ref}, T)/I_2(P_{ref}, T_{ref}) - B_{20}}{B_{21}} \right] \quad (6)$$

The corrected luminescence intensity values,  $I_1(P_{ref}, T_1)$ , were determined from

$$\frac{I_1(P_{ref}, T_1)}{I_1(P, T)} = \frac{I_1(P_{ref}, T_1)}{I_1(P_{ref}, T_{ref})} \times \frac{I_1(P_{ref}, T_{ref})}{I_1(P, T)} \quad (7)$$

where the  $I_1(P, T)$  and  $I_1(P_{ref}, T_{ref})$  represent the luminescence intensity of reference state and intensity change caused by the combined effect of temperature and pressure.

Here we used the temperature dependence of the Ru(dpp)<sub>3</sub> luminescence intensities based on static calibration derived from Eq. 3 as follows:

$$T_1 = T_{ref} \left[ \frac{-B_{11} + \sqrt{B_{11}^2 - 4B_{12} \left( B_{10} - I_1(P_{ref}, T) / I_1(P_{ref}, T_{ref}) \right)}}{2B_{12}} \right] \quad (8)$$

For dual luminophore coating, the temperature of  $T_1$  equals to  $T_2$ . Using the corrected luminescence intensity values obtained from Eq. 7 and Eq. 8, the pressure values after the temperature corrections were eventually calculated as follows:

$$P = P_{ref} \frac{I_1(P_{ref}, T_1) / I_1(P, T) - A_0(T_{ref})}{A_1(T_{ref})} \quad (9)$$

#### 4. Supplementary Table

**Table S1.** Conditions for the wind channel test

|      | <b>Ma</b> | <b>P<sub>0</sub> (MPa)</b> | <b>T<sub>0</sub> (K)</b> | <b>P<sub>∞</sub> (Pa)</b> | <b>T<sub>∞</sub> (K)</b> | <b>ρ<sub>∞</sub> (kg/m<sup>3</sup>)</b> | <b>u<sub>∞</sub> (m/s)</b> | <b>Re<sub>∞</sub> (10e<sup>7</sup>/m)</b> |
|------|-----------|----------------------------|--------------------------|---------------------------|--------------------------|-----------------------------------------|----------------------------|-------------------------------------------|
| Case | 6.5       | 2.51                       | 600                      | 1066                      | 65                       | 0.056                                   | 1036                       | 1.4                                       |
